# Supplementary material for: Prediction of mining-induced seismicity and damage assessment of induced surface buildings in thick and hard key stratum working face: a case study of Liuhuanggou coal mine in China
Source: Frontiers journal article supplement (doi:10.3389/feart.2023.1238055), 2023-08-30
Supplement: Table_1.XLSX [file Table_1.XLSX]

## Sheet: Fig.9
	time	Total energy of daily mining-induced seismicity events	Total frequency of daily mining-induced seismicity events
	2018-12-24	21268.7	1
	2018-12-25	11541.9	1
	2018-12-26	0	0
	2018-12-27	17556.3	1
	2018-12-28	28167.9	1
	2018-12-29	30399.5	1
	2018-12-30	19328.6	1
	2018-12-31	0	0
	2019-01-01	23175.4	1
	2019-01-02	68924.8	3
	2019-01-03	30065.8	1
	2019-01-04	20656.5	1
	2019-01-05	0	0
	2019-01-06	24328.1	1
	2019-01-07	96164.2	2
	2019-01-08	131583	4
	2019-01-09	108257	5
	2019-01-10	77222.1	2
	2019-01-11	0	0
	2019-01-12	0	0
	2019-01-13	59140.2	2
	2019-01-14	30003.3	1
	2019-01-15	37009.4	1
	2019-01-16	16522.6	1
	2019-01-17	0	0
	2019-01-18	13144.9	1
	2019-01-19	9854.61	1
	2019-01-20	0	0
	2019-01-21	0	0
	2019-01-22	0	0
	2019-01-23	19811.6	1
	2019-01-24	41062	2
	2019-01-25	10609.4	1
	2019-01-26	198019	5
	2019-01-27	62412	2
	2019-01-28	9720.76	1
	2019-01-29	0	0
	2019-01-30	0	0
	2019-01-31	12755.8	1
	2019-02-01	14434.1	1
	2019-02-02	0	0
	2019-02-03	0	0
	2019-02-04	0	0
	2019-02-05	0	0
	2019-02-06	0	0
	2019-02-07	0	0
	2019-02-08	51093	1
	2019-02-09	0	0
	2019-02-10	0	0
	2019-02-11	81895.2	2
	2019-02-12	0	0
	2019-02-13	19258.4	1
	2019-02-14	56182.9	1
	2019-02-15	34238.7	3
	2019-02-16	10932.4	1
	2019-02-17	25705.1	2
	2019-02-18	233890	4
	2019-02-19	135057	3
	2019-02-20	86034.6	4
	2019-02-21	103004	5
	2019-02-22	22549.1	1
	2019-02-23	33031.2	1
	2019-02-24	79700.1	1
	2019-02-25	31641.8	1
	2019-02-26	192212	5
	2019-02-27	163298	5
	2019-02-28	147655	3
	2019-03-01	50828.5	1
	2019-03-02	71482	4
	2019-03-03	131789	3
	2019-03-04	118910	2
	2019-03-05	210711	5
	2019-03-06	145771	3
	2019-03-07	20418.2	2
	2019-03-08	103029	2
	2019-03-09	0	0
	2019-03-10	59486.4	1
	2019-03-11	13256.1	1
	2019-03-12	53826	3
	2019-03-13	0	0
	2019-03-14	0	0
	2019-03-15	10098.6	1
	2019-03-16	167877	5
	2019-03-17	109121	3
	2019-03-18	0	0
	2019-03-19	63259.4	2
	2019-03-20	0	0
	2019-03-21	18849.8	1
	2019-03-22	180834	4
	2019-03-23	0	0
	2019-03-24	136960	2
	2019-03-25	0	0
	2019-03-26	52940.1	2
	2019-03-27	27402.5	1
	2019-03-28	37550.3	2
	2019-03-29	68410.5	3
	2019-03-30	28789.6	2
	2019-03-31	0	0
	2019-04-01	15024.9	1
	2019-04-02	58536.8	2
	2019-04-03	42204	2
	2019-04-04	9812.53	1
	2019-04-05	103820	3
	2019-04-06	135299	3
	2019-04-07	11232.9	1
	2019-04-08	133088	2
	2019-04-09	128414	5
	2019-04-10	0	0
	2019-04-11	37261.9	2
	2019-04-12	0	0
	2019-04-13	38303.3	2
	2019-04-14	77353.3	1
	2019-04-15	53577.5	3
	2019-04-16	57157.1	1
	2019-04-17	161558	4
	2019-04-18	46485.6	2
	2019-04-19	200318	3
	2019-04-20	0	0
	2019-04-21	113359	4
	2019-04-22	85530.3	2
	2019-04-23	102696	2
	2019-04-24	0	0
	2019-04-25	112541	2
	2019-04-26	39650	1
	2019-04-27	109529	2
	2019-04-28	43872.2	1
	2019-04-29	56403.3	1
	2019-04-30	45658.4	2
	2019-05-01	110402	2
	2019-05-02	56361.8	3
	2019-05-03	29873.1	1
	2019-05-04	0	0
	2019-05-05	50116	1
	2019-05-06	63828.5	3
	2019-05-07	82376	2
	2019-05-08	29584.3	2
	2019-05-09	273151	4
	2019-05-10	65729.8	3
	2019-05-11	124913	3
	2019-05-12	187030	3
	2019-05-13	651121	4
	2019-05-14	39400.5	2
	2019-05-15	122785	4
	2019-05-16	119608	2
	2019-05-17	93620.2	3
	2019-05-18	149411	4
	2019-05-19	176618	5
	2019-05-20	116385	4
	2019-05-21	3088470	5
	2019-05-22	184427	8
	2019-05-23	183771	7
	2019-05-24	104551	2
	2019-05-25	79275.5	4
	2019-05-26	87146.1	3
	2019-05-27	258240	7
	2019-05-28	144575	4
	2019-05-29	84590.4	2
	2019-05-30	10257	1
	2019-05-31	0	0
	2019-06-01	59390.4	3
	2019-06-02	6668440	4
	2019-06-03	22729.1	1
	2019-06-04	11883.8	1
	2019-06-05	39900.7	1
	2019-06-06	784294	1
	2019-06-07	16050.1	1
	2019-06-08	11763.2	1
	2019-06-09	194904	3
	2019-06-10	0	0
	2019-06-11	0	0
	2019-06-12	47332.7	2
	2019-06-13	62238.9	1
	2019-06-14	31745.6	1
	2019-06-15	6083850	2
	2019-06-16	56821.2	2
	2019-06-17	119476	2
	2019-06-18	0	0
	2019-06-19	0	0
	2019-06-20	34082.5	1
	2019-06-21	112836	2
	2019-06-22	69630.8	2
	2019-06-23	29396.1	1
	2019-06-24	88658.4	3
	2019-06-25	56621.1	3
	2019-06-26	70971.3	2
	2019-06-27	24096	1
	2019-06-28	155779	3
	2019-06-29	65637.4	3
	2019-06-30	0	0
	2019-07-01	28366.7	1
	2019-07-02	0	0
	2019-07-03	10484.6	1
	2019-07-04	55700.4	2
	2019-07-05	95004.5	3
	2019-07-06	65576.9	1
	2019-07-07	11197.3	1
	2019-07-08	0	0
	2019-07-09	10542.9	1
	2019-07-10	13770.4	1
	2019-07-11	40430.7	1
	2019-07-12	28666.8	1
	2019-07-13	36208.2	2
	2019-07-14	26445.9	1
	2019-07-15	32925	1
	2019-07-16	11344.4	1
	2019-07-17	0	0
	2019-07-18	167088	6
	2019-07-19	24244.8	1
	2019-07-20	23289.3	2
	2019-07-21	90563.5	1
	2019-07-22	0	0
	2019-07-23	89602.4	3
	2019-07-24	0	0
	2019-07-25	52535.9	2
	2019-07-26	0	0
	2019-07-27	0	0
	2019-07-28	0	0
	2019-07-29	0	0
	2019-07-30	1255730	3
	2019-07-31	0	0
	2019-08-01	92638.2	2
	2019-08-02	0	0
	2019-08-03	0	0
	2019-08-04	5424530	3
	2019-08-05	22269.6	1
	2019-08-06	14846.9	1
	2019-08-07	115114	2
	2019-08-08	13698.3	1
	2019-08-09	38556.5	1
	2019-08-10	328951	2
	2019-08-11	160346	3
	2019-08-12	73990.1	1
	2019-08-13	7668410	1
	2019-08-14	28686	1
	2019-08-15	9830.58	1
	2019-08-16	37161.2	3
	2019-08-17	138345	4
	2019-08-18	98465.5	2
	2019-08-19	34739.1	2
	2019-08-20	138021	4
	2019-08-21	257820	7
	2019-08-22	247918	5
	2019-08-23	137158	4
	2019-08-24	247741	8
	2019-08-25	5588040	4
	2019-08-26	85722.1	4
	2019-08-27	692577	2
	2019-08-28	115007	3
	2019-08-29	693003	7
	2019-08-30	7219730	7
	2019-08-31	0	0
	2019-09-01	45432.8	2
	2019-09-02	186383	8
	2019-09-03	1310670	9
	2019-09-04	175346	7
	2019-09-05	386596	6
	2019-09-06	1142360	10
	2019-09-07	6778180	9
	2019-09-08	1392620	9
	2019-09-09	982597	5
	2019-09-10	907643	17
	2019-09-11	406781	8
	2019-09-12	100103	3
	2019-09-13	1367950	16
	2019-09-14	1321360	10
	2019-09-15	6105300	9
	2019-09-16	875335	15
	2019-09-17	840665	14
	2019-09-18	435189	10
	2019-09-19	7088910	11
	2019-09-20	541431	7
	2019-09-21	821599	11
	2019-09-22	496229	11
	2019-09-23	369867	9
	2019-09-24	756867	4
	2019-09-25	187865	8
	2019-09-26	152442	3
	2019-09-27	1832630	10
	2019-09-28	257923	8
	2019-09-29	2653590	17
	2019-09-30	0	0
	2019-10-01	50852.7	1
	2019-10-02	33830.2	2
	2019-10-03	41911.6	1
	2019-10-04	17159.5	1
	2019-10-05	0	0
	2019-10-06	0	0
	2019-10-07	34824.7	1
	2019-10-08	161665	7
	2019-10-09	994759	5
	2019-10-10	79496.7	3
	2019-10-11	158929	6
	2019-10-12	300061	6
	2019-10-13	421604	8
	2019-10-14	284016	9
	2019-10-15	696028	11
	2019-10-16	1797480	10
	2019-10-17	2507720	7
	2019-10-18	1170220	7
	2019-10-19	3170510	12
	2019-10-20	428656	6
	2019-10-21	817849	11
	2019-10-22	249025	10
	2019-10-23	1676680	11
	2019-10-24	1893640	6
	2019-10-25	1279390	10
	2019-10-26	709301	7
	2019-10-27	431797	12
	2019-10-28	749005	14
	2019-10-29	1242620	10
	2019-10-30	680852	13
	2019-10-31	760919	9
	2019-11-01	376569	10
	2019-11-02	457214	8
	2019-11-03	1906370	12
	2019-11-04	34672100	12
	2019-11-05	2258890	14
	2019-11-06	397115	16
	2019-11-07	3115370	13
	2019-11-08	1619660	18
	2019-11-09	233528	8
	2019-11-10	1566000	12
	2019-11-11	859426	8
	2019-11-12	504064	12
	2019-11-13	2563590	6
	2019-11-14	141284	6
	2019-11-15	1076370	6
	2019-11-16	276096	10
	2019-11-17	6092790	9
	2019-11-18	506070	15
	2019-11-19	40814.7	2
	2019-11-20	319701	6
	2019-11-21	1617330	19
	2019-11-22	566700	15
	2019-11-23	109929	5
	2019-11-24	487923	14
	2019-11-25	571144	11
	2019-11-26	294382	9
	2019-11-27	253781	9
	2019-11-28	194261	9
	2019-11-29	1895730	14
	2019-11-30	257040	7
	2019-12-01	522505	13
	2019-12-02	227578	6
	2019-12-03	68219.5	3
	2019-12-04	375139	13
	2019-12-05	283157	8
	2019-12-06	517201	13
	2019-12-07	166652	6
	2019-12-08	431552	10
	2019-12-09	285674	9
	2019-12-10	51803300	7
	2019-12-11	110204	4
	2019-12-12	193803	4
	2019-12-13	309784	9
	2019-12-14	475805	13
	2019-12-15	461788	17
	2019-12-16	334905	7
	2019-12-17	269223	9
	2019-12-18	61826.9	3
	2019-12-19	70412.9	3
	2019-12-20	475918	8
	2019-12-21	97553.2	4
	2019-12-22	275164	7
	2019-12-23	257142	7
	2019-12-24	186857	4
	2019-12-25	91350.7	5
	2019-12-26	121238	6
	2019-12-27	0	0
	2019-12-28	445152	12
	2019-12-29	342473	9
	2019-12-30	281364	9
	2019-12-31	11958.4	1
	2020-01-01	12584.9	1
	2020-01-02	12843	1
	2020-01-03	186209	7
	2020-01-04	186151	6
	2020-01-05	196829	8
	2020-01-06	341413	15
	2020-01-07	160752	8
	2020-01-08	320276	15
	2020-01-09	499567	13
	2020-01-10	771035	10
	2020-01-11	278667	8
	2020-01-12	151242	6
	2020-01-13	495811	11
	2020-01-14	191845	7
	2020-01-15	117472	7
	2020-01-16	312035	8
	2020-01-17	65786.9	4
	2020-01-18	162238	6
	2020-01-19	17275400	10
	2020-01-20	410433	9
	2020-01-21	211666	6
	2020-01-22	221446	7
	2020-01-23	275263	4
	2020-01-24	0	0
	2020-01-25	55794.4	2
	2020-01-26	23774	1
	2020-01-27	28130.5	1
	2020-01-28	0	0
	2020-01-29	0	0
	2020-01-30	0	0
	2020-01-31	38634.5	2
	2020-02-01	198438	4
	2020-02-02	221024	8
	2020-02-03	167984	7
	2020-02-04	266734	8
	2020-02-05	96475.2	3
	2020-02-06	342761	10
	2020-02-07	98577.6	5
	2020-02-08	202193	9
	2020-02-09	209858	6
	2020-02-10	117241	5
	2020-02-11	241891	11
	2020-02-12	128220	4
	2020-02-13	105746	4
	2020-02-14	283657	9
	2020-02-15	101913	4
	2020-02-16	122992	5
	2020-02-17	126197	4
	2020-02-18	163964	7
	2020-02-19	226701	8
	2020-02-20	199125	6
	2020-02-21	228931	8
	2020-02-22	112016	4
	2020-02-23	9804060	6
	2020-02-24	209332	6
	2020-02-25	129078	7
	2020-02-26	194650	10
	2020-02-27	284482	8
	2020-02-28	160767	7
	2020-02-29	0	0
	2020-03-01	13637.2	1
	2020-03-02	350921	11
	2020-03-03	182594	7
	2020-03-04	392942	13
	2020-03-05	252653	8
	2020-03-06	388863	15
	2020-03-07	484183	16
	2020-03-08	324993	16
	2020-03-09	196811	9
	2020-03-10	146454	8
	2020-03-11	175764	6
	2020-03-12	230578	11
	2020-03-13	143005	6
	2020-03-14	402823	14
	2020-03-15	124034	5
	2020-03-16	281893	13
	2020-03-17	239119	11
	2020-03-18	220497	11
	2020-03-19	53902.8	3
	2020-03-20	131382	6
	2020-03-21	91907.5	4
	2020-03-22	140183	4
	2020-03-23	139075	7
	2020-03-24	87373.8	5
	2020-03-25	243637	12
	2020-03-26	418211	7
	2020-03-27	1420910	5
	2020-03-28	89939.7	4
	2020-03-29	642185	4
	2020-03-30	118014	6
	2020-03-31	137872	5
	2020-04-01	29101.4	2
	2020-04-02	113736	6
	2020-04-03	125762	4
	2020-04-04	122357	3
	2020-04-05	136347	7
	2020-04-06	85236.8	4
	2020-04-07	126831	7
	2020-04-08	156201	5
	2020-04-09	137518	6
	2020-04-10	45264.5	2
	2020-04-11	756132	7
	2020-04-12	60186.8	5
	2020-04-13	11270.5	1
	2020-04-14	45653.6	2
	2020-04-15	31468.2	2
	2020-04-16	119297	4
	2020-04-17	53737.1	5
	2020-04-18	138753	7
	2020-04-19	143345	7
	2020-04-20	179953	7
	2020-04-21	103908	5
	2020-04-22	57498.3	3
	2020-04-23	77793.4	3
	2020-04-24	118167	4
	2020-04-25	93401.3	6
	2020-04-26	190162	9
	2020-04-27	129514	4
	2020-04-28	168936	8
	2020-04-29	82820.8	5
	2020-04-30	165209	8
	2020-05-01	106686	7
	2020-05-02	50531.4	3
	2020-05-03	182294	4
	2020-05-04	322142	16
	2020-05-05	304085	10
	2020-05-06	66137.6	3
	2020-05-07	149734	6
	2020-05-08	108978	3
	2020-05-09	102338	4
	2020-05-10	41200.5	2
	2020-05-11	118237	5
	2020-05-12	124271	3
	2020-05-13	158056	7
	2020-05-14	65480.8	2
	2020-05-15	0	0
	2020-05-16	127774	4
	2020-05-17	321347	10
	2020-05-18	206542	7
	2020-05-19	169667	9
	2020-05-20	103662	6
	2020-05-21	187796	5
	2020-05-22	50164.4	3
	2020-05-23	30755	2
	2020-05-24	172364	4
	2020-05-25	92819.8	5
	2020-05-26	104521	4
	2020-05-27	126798	5
	2020-05-28	163950	10
	2020-05-29	213738	5
	2020-05-30	172590	7
	2020-05-31	43581.2	3
	2020-06-01	40021.1	3
	2020-06-02	112895	5
	2020-06-03	157490	8
	2020-06-04	92288.4	5
	2020-06-05	89134.3	3
	2020-06-06	36830.7	2
	2020-06-07	207669	4
	2020-06-08	80878.1	3
	2020-06-09	77236.9	2
	2020-06-10	60416	4
	2020-06-11	121469	8
	2020-06-12	41615.9	3
	2020-06-13	33495.5	2
	2020-06-14	16763.7	1
	2020-06-15	74424.9	2
	2020-06-16	185715	9
	2020-06-17	45687.4	2
	2020-06-18	78092	2
	2020-06-19	47732.6	4
	2020-06-20	31290.9	2
	2020-06-21	79953.5	5
	2020-06-22	22385.3	1
	2020-06-23	92170.4	7
	2020-06-24	58831.6	1
	2020-06-25	69920.5	2
	2020-06-26	40749.7	2
	2020-06-27	0	0
	2020-06-28	0	0
	2020-06-29	0	0
	2020-06-30	66192.8	2
	2020-07-01	0	0
	2020-07-02	10517.7	1
	2020-07-03	15023.3	1

## Sheet: Fig.11
	Longitude coordinate	Latitude coordinates	Elevation
	29514100	4841150	616
	29515000	4841720	693
	29515500	4841990	603
	29515100	4841510	605
	29515400	4842040	606
	29515400	4841930	781
	29515600	4841580	786
	29514200	4841130	609
	29514200	4841090	710
	29514000	4841150	602
	29515100	4841460	516
	29515400	4841630	717
	29514100	4841160	615
	29515500	4841900	722
	29513900	4841010	724
	29515600	4841800	781
	29513900	4841010	716
	29513900	4841020	733
	29514000	4841110	626
	29514100	4841210	662
	29515600	4841890	772
	29515600	4841660	775
	29515600	4841660	774
	29514000	4841020	737
	29514100	4841100	695
	29515600	4841950	780
	29514100	4841090	696
	29515600	4841760	777
	29514000	4841060	691
	29515700	4841640	788
	29514100	4841080	663
	29514100	4841100	631
	29514000	4841090	621
	29515700	4841840	776
	29514100	4841110	637
	29515500	4841830	786
	29515200	4841760	744
	29514200	4841270	589
	29513900	4841020	737
	29514000	4841110	625
	29514000	4841050	683
	29514000	4841050	705
	29513900	4841030	701
	29514200	4841260	525
	29514000	4841050	679
	29514200	4841260	697
	29514000	4840970	737
	29513900	4841020	708
	29515400	4841710	779
	29515100	4841320	788
	29514000	4841090	684
	29514000	4841010	730
	29515700	4841710	779
	29514000	4841020	740
	29514000	4840970	723
	29514100	4841150	629
	29515700	4841720	718
	29515600	4841880	703
	29514100	4841060	695
	29514000	4841070	644
	29514000	4841020	725
	29514100	4841080	676
	29514400	4841180	707
	29514100	4841200	698
	29514000	4841100	630
	29514000	4841070	676
	29514000	4841090	679
	29515400	4841630	797
	29514200	4841060	719
	29514000	4841080	686
	29515600	4841760	846
	29515300	4841510	877
	29515700	4841670	783
	29514000	4841010	739
	29514000	4841070	680
	29515600	4841680	778
	29514000	4841010	729
	29514000	4841100	675
	29514100	4841090	700
	29514000	4841090	693
	29514100	4841190	695
	29514200	4841230	702
	29514100	4841070	685
	29514000	4841110	655
	29514000	4841060	690
	29513900	4841020	703
	29514000	4841010	718
	29514000	4841130	687
	29514100	4841160	703
	29514000	4840980	762
	29514100	4841120	684
	29514000	4841120	659
	29515300	4841610	747
	29515600	4841660	778
	29514000	4841090	690
	29514000	4841110	702
	29514000	4841010	736
	29514200	4841260	692
	29514100	4841200	693
	29514100	4841090	696
	29514000	4841020	729
	29513900	4841060	699
	29514000	4841020	738
	29513900	4841050	700
	29514000	4841100	688
	29514000	4841030	686
	29514000	4841080	650
	29514000	4841040	738
	29514100	4841200	714
	29514000	4841040	675
	29514000	4841070	667
	29514000	4841030	671
	29514300	4841190	666
	29515600	4841560	786
	29514100	4841150	702
	29514000	4841010	692
	29514100	4841150	620
	29514100	4841090	614
	29514000	4841070	663
	29515000	4841460	723
	29515600	4841680	783
	29514000	4841010	718
	29514000	4841220	650
	29514000	4841130	623
	29514200	4841160	678
	29514100	4841120	675
	29514200	4841150	694
	29514000	4841130	651
	29513900	4841030	603
	29514300	4841260	736
	29514100	4840930	725
	29514300	4841220	712
	29515300	4841640	736
	29514200	4841200	615
	29514200	4841090	707
	29514100	4841140	607
	29514200	4840990	722
	29514200	4841120	704
	29514300	4841210	613
	29514200	4841180	731
	29514100	4841240	653
	29514200	4841050	699
	29514200	4841160	708
	29514200	4841150	674
	29514200	4841280	607
	29514000	4841260	672
	29514200	4841380	717
	29514200	4841280	609
	29514400	4841230	702
	29514200	4841290	669
	29514300	4841440	733
	29514200	4841210	666
	29514500	4841270	701
	29514300	4841410	741
	29515500	4842120	774
	29514900	4841400	732
	29514300	4841280	379
	29514000	4841100	630
	29514200	4841280	621
	29514300	4841260	736
	29515300	4841620	743
	29514200	4841290	683
	29514300	4841340	607
	29515700	4841790	750
	29514300	4841270	673
	29514600	4841410	712
	29514300	4841230	685
	29514300	4841190	725
	29514300	4841210	701
	29514400	4841440	689
	29515300	4841990	658
	29515300	4841690	749
	29514600	4841380	690
	29514400	4841410	658
	29514300	4841220	716
	29514400	4841380	615
	29514500	4841140	731
	29515400	4841540	707
	29514400	4841340	701
	29515200	4841460	747
	29514800	4841350	723
	29514600	4841330	723
	29514500	4841230	714
	29514500	4841190	736
	29514400	4841350	689
	29514300	4841250	692
	29514400	4841220	719
	29514300	4841270	680
	29514400	4841450	738
	29514400	4841450	708
	29514500	4841390	773
	29514500	4841280	702
	29514400	4841420	666
	29514300	4841370	634
	29514500	4841360	705
	29514400	4841290	678
	29515600	4842020	778
	29514500	4841270	697
	29514300	4841270	686
	29514500	4841080	745
	29514600	4841370	732
	29514400	4841410	682
	29514500	4841420	625
	29514400	4841240	726
	29514300	4841120	718
	29514200	4841300	596
	29514200	4841200	636
	29514500	4841340	704
	29515600	4841440	778
	29514400	4841350	752
	29514500	4841330	837
	29514300	4841100	750
	29514600	4841260	745
	29514400	4841250	704
	29514500	4841360	814
	29514300	4841240	714
	29514500	4841370	732
	29515300	4841630	682
	29514400	4841350	768
	29514300	4841370	697
	29514500	4841400	705
	29514400	4841320	697
	29514400	4841360	681
	29514400	4841400	711
	29514400	4841260	702
	29514200	4840990	692
	29514200	4840870	701
	29514400	4841390	700
	29514400	4841360	614
	29514400	4841220	710
	29514400	4841340	621
	29514300	4841290	650
	29514600	4841140	734
	29514300	4841150	681
	29514500	4841370	631
	29514500	4841370	631
	29515300	4841620	743
	29515300	4841620	743
	29514400	4841370	620
	29514500	4841310	652
	29514400	4841360	598
	29514500	4841370	630
	29514400	4841310	701
	29514400	4841390	712
	29515100	4841330	753
	29514300	4841350	618
	29514400	4841310	750
	29514400	4841360	631
	29515100	4841410	742
	29514600	4841360	704
	29514300	4841240	771
	29514400	4841400	692
	29514400	4841300	629
	29514500	4841320	693
	29514400	4841330	691
	29514400	4841340	616
	29514400	4841350	621
	29514400	4841380	621
	29514300	4841340	699
	29514400	4841400	615
	29514300	4841350	610
	29514400	4841360	689
	29514500	4841330	706
	29514300	4841310	702
	29514400	4841320	620
	29514600	4841380	708
	29514400	4841170	707
	29514100	4841230	651
	29515200	4841250	779
	29514400	4841310	613
	29514400	4841190	698
	29514400	4841330	698
	29514400	4841400	695
	29514400	4841310	701
	29515400	4841950	790
	29514400	4841400	608
	29514600	4841310	723
	29514400	4841290	701
	29514400	4841380	715
	29514400	4841370	598
	29514300	4841120	724
	29514500	4841300	705
	29515300	4841450	728
	29514400	4841210	709
	29514500	4841280	703
	29514400	4841330	633
	29514400	4841310	698
	29514400	4841320	699
	29514400	4841360	625
	29515700	4841700	768
	29514200	4841150	698
	29514400	4841290	696
	29514500	4841300	697
	29514200	4841280	663
	29514400	4841310	698
	29514400	4841340	706
	29514300	4841260	724
	29514500	4841290	704
	29514400	4841270	703
	29515500	4841720	728
	29514200	4841310	645
	29515500	4841900	739
	29515400	4841610	750
	29514300	4841380	639
	29515400	4841610	743
	29514300	4841310	687
	29514300	4841340	675
	29514400	4841400	629
	29514400	4841330	678
	29514500	4841390	690
	29514500	4841340	713
	29514300	4841320	635
	29514400	4841360	654
	29514400	4841390	616
	29514500	4841430	698
	29515100	4841500	730
	29515500	4842050	794
	29514300	4841210	710
	29514400	4841360	695
	29515300	4841560	787
	29514300	4841290	690
	29514200	4841150	680
	29514400	4841380	649
	29514400	4841330	707
	29514200	4841320	644
	29514700	4841150	759
	29514400	4841400	615
	29514700	4841230	730
	29514400	4841350	638
	29514300	4841330	669
	29514400	4841390	651
	29514500	4841410	621
	29514400	4841410	612
	29514500	4841430	613
	29514400	4841350	633
	29514400	4841400	601
	29514600	4841430	707
	29514400	4841370	620
	29515700	4841750	773
	29514300	4841220	704
	29514400	4841390	622
	29514700	4841230	724
	29514400	4841330	697
	29514200	4841130	714
	29514400	4841400	610
	29514300	4841360	622
	29515400	4841600	775
	29514400	4841340	717
	29514400	4841320	712
	29514400	4841420	609
	29514400	4841400	620
	29514900	4841190	768
	29514400	4841370	637
	29515300	4841590	771
	29514200	4841160	713
	29514400	4841360	616
	29514400	4841080	737
	29514300	4841340	633
	29514500	4841390	675
	29514500	4841320	703
	29514500	4841230	715
	29514300	4841310	680
	29514400	4841430	689
	29514400	4841410	604
	29514600	4841320	701
	29514300	4841210	685
	29514500	4841120	716
	29514700	4841500	709
	29514400	4841300	734
	29515300	4841590	759
	29514400	4841430	606
	29514400	4841340	735
	29514500	4841400	710
	29514500	4841480	618
	29514400	4841410	736
	29514600	4841130	733
	29514400	4841380	661
	29515400	4841640	741
	29514700	4841200	733
	29514500	4841380	701
	29514300	4841290	753
	29514500	4841420	701
	29514400	4841270	710
	29515200	4841450	735
	29514500	4841430	702
	29515900	4841870	793
	29514400	4841480	616
	29515400	4841510	782
	29515400	4841580	772
	29515200	4841560	736
	29515300	4841600	747
	29514500	4841440	695
	29514800	4841550	698
	29514500	4841400	616
	29514500	4841410	763
	29515400	4841640	748
	29514400	4841300	690
	29514400	4841340	690
	29514800	4841520	698
	29514500	4841440	785
	29514500	4841340	735
	29514500	4841430	697
	29514400	4841400	640
	29515400	4841870	729
	29514400	4841330	656
	29514700	4841400	706
	29514400	4841400	687
	29514500	4841340	680
	29514500	4841320	699
	29514600	4841400	697
	29514500	4841460	621
	29514500	4841320	694
	29514500	4841390	698
	29514500	4841400	679
	29514400	4841420	618
	29514400	4841330	688
	29514500	4841380	705
	29514500	4841490	621
	29514400	4841320	738
	29514500	4841500	611
	29514400	4841320	685
	29514400	4841380	613
	29514500	4841380	674
	29514500	4841500	620
	29515200	4841380	758
	29514500	4841470	610
	29514500	4841370	694
	29515300	4842020	707
	29514800	4841500	702
	29514400	4841360	610
	29514400	4841420	617
	29514600	4841440	624
	29514500	4841400	704
	29514500	4841490	610
	29514800	4841330	757
	29514900	4841510	707
	29514500	4841480	620
	29514700	4841290	731
	29514500	4841310	679
	29514500	4841340	684
	29514500	4841310	675
	29514500	4841520	640
	29514500	4841510	610
	29514600	4841360	714
	29514500	4841480	611
	29514800	4841460	706
	29514400	4841400	631
	29514500	4841270	671
	29514500	4841310	675
	29514500	4841460	623
	29514400	4841500	660
	29514500	4841440	618
	29514400	4841440	625
	29514600	4841350	702
	29514500	4841490	616
	29514500	4841460	621
	29514500	4841450	621
	29514700	4841490	692
	29514300	4841170	716
	29514400	4841400	616
	29514500	4841500	620
	29514800	4841290	738
	29514500	4841140	736
	29514600	4841400	632
	29514800	4841240	754
	29514500	4841330	704
	29514400	4841380	623
	29514400	4841390	613
	29515400	4842120	672
	29514600	4841560	618
	29514500	4841510	614
	29515100	4841530	737
	29514500	4841460	646
	29514600	4841440	743
	29514600	4841180	735
	29514500	4841330	672
	29514500	4841510	609
	29514500	4841410	637
	29514500	4841330	685
	29514500	4841510	620
	29514900	4841590	709
	29514600	4841360	725
	29514400	4841460	625
	29514400	4841430	621
	29514500	4841490	617
	29514500	4841300	668
	29514500	4841470	617
	29514500	4841380	688
	29514600	4841560	615
	29514500	4841430	627
	29514500	4841510	609
	29514500	4841340	682
	29514600	4841540	613
	29515200	4841360	782
	29514500	4841370	675
	29514700	4841040	817
	29514500	4841320	702
	29514600	4841530	617
	29514500	4841470	614
	29514300	4841350	612
	29514500	4841440	618
	29514500	4841440	625
	29514600	4841010	757
	29514400	4841230	710
	29514400	4841410	612
	29514500	4841450	628
	29514400	4841390	617
	29514600	4841480	629
	29514400	4841430	614
	29514600	4841550	616
	29514500	4840940	717
	29514400	4841420	650
	29514300	4841230	659
	29514400	4841330	664
	29514500	4841390	622
	29514500	4841470	616
	29514400	4841400	600
	29514500	4841450	622
	29514500	4841560	611
	29514500	4841510	674
	29514500	4841560	621
	29514500	4841450	659
	29514500	4841390	700
	29514400	4841460	613
	29514500	4841530	613
	29514500	4841480	617
	29514500	4841540	619
	29514500	4841540	608
	29514500	4841330	698
	29514400	4841330	723
	29514600	4841550	620
	29514500	4841550	612
	29514500	4841530	617
	29514500	4841440	624
	29514800	4841310	729
	29514500	4841490	616
	29514500	4841460	711
	29514600	4841440	733
	29514500	4841370	732
	29514400	4841450	612
	29514500	4841430	621
	29514500	4841440	621
	29514500	4841420	619
	29514400	4841410	632
	29514500	4841570	587
	29514500	4841500	617
	29514500	4841480	614
	29514500	4841450	624
	29514500	4841440	617
	29514500	4841550	642
	29515300	4841450	753
	29514500	4841320	841
	29514500	4841340	742
	29514500	4841420	668
	29514500	4841530	614
	29514900	4841220	757
	29514500	4841410	709
	29514500	4841530	620
	29514600	4841560	617
	29514500	4841470	632
	29514500	4841450	621
	29514600	4841380	757
	29514500	4841480	652
	29514500	4841450	619
	29514500	4841560	676
	29514400	4841360	729
	29514600	4841520	610
	29514500	4841390	656
	29515100	4841250	783
	29514600	4841560	611
	29514500	4841510	619
	29514400	4841500	652
	29514500	4841390	652
	29514500	4841410	641
	29514400	4841450	664
	29514400	4841540	612
	29514500	4841450	631
	29514600	4841420	718
	29514500	4841250	697
	29514600	4841410	693
	29514600	4841390	765
	29514400	4841460	614
	29514500	4841510	607
	29514500	4841450	686
	29514500	4841510	613
	29514500	4841520	626
	29514500	4841370	645
	29514600	4841550	618
	29514500	4841460	661
	29514600	4841410	686
	29514500	4841450	661
	29515400	4841480	761
	29514500	4841320	725
	29514500	4841450	653
	29514500	4841370	713
	29514500	4841480	645
	29514500	4841350	739
	29514300	4841390	638
	29514600	4841440	680
	29514400	4841390	705
	29514600	4841440	673
	29514600	4841450	657
	29514500	4841470	622
	29514500	4841510	627
	29514500	4841470	669
	29514500	4841450	644
	29514600	4841360	733
	29514500	4841510	623
	29514600	4841480	719
	29514500	4841470	612
	29514500	4841540	629
	29514500	4841340	724
	29514600	4841320	702
	29514500	4841450	616
	29514500	4841540	632
	29514600	4841520	626
	29514600	4841440	659
	29514600	4841380	715
	29514700	4841440	692
	29514600	4841390	694
	29514600	4841490	610
	29514500	4841500	622
	29514500	4841360	706
	29514500	4841450	641
	29514600	4841380	703
	29514500	4841440	628
	29514600	4841350	700
	29514600	4841460	672
	29514600	4841430	719
	29514600	4841530	668
	29514500	4841500	659
	29514600	4841360	717
	29514500	4841250	713
	29514600	4841450	665
	29514400	4841440	618
	29514700	4841190	649
	29514500	4841450	626
	29514600	4841400	717
	29514600	4841440	673
	29515700	4841760	779
	29514500	4841490	650
	29514600	4841490	692
	29514600	4841490	657
	29514500	4841420	629
	29514600	4841400	684
	29514500	4841470	623
	29514700	4841230	725
	29514400	4841100	770
	29514700	4841490	686
	29514700	4841290	734
	29514500	4841360	640
	29515000	4841290	771
	29514700	4841380	721
	29514500	4841420	683
	29514500	4841450	654
	29514500	4841370	716
	29514500	4841540	663
	29514600	4841440	681
	29514600	4841430	729
	29514600	4841460	673
	29514600	4841390	737
	29514600	4841360	697
	29514500	4841500	685
	29514500	4841480	645
	29514600	4841360	765
	29514700	4841410	783
	29514500	4841440	725
	29514600	4841530	648
	29514600	4841280	762
	29514700	4841470	651
	29514600	4841380	677
	29514700	4841380	722
	29514600	4841450	651
	29514500	4840910	762
	29514500	4841490	688
	29514600	4841460	654
	29514700	4841450	660
	29514700	4841410	719
	29514600	4841420	700
	29514600	4841410	723
	29514400	4841030	734
	29514500	4841340	715
	29514600	4841470	652
	29514500	4841380	714
	29514400	4841580	679
	29514500	4841440	691
	29514600	4841410	708
	29514600	4841490	658
	29514700	4841420	717
	29514500	4841530	714
	29514700	4841370	718
	29514500	4841570	683
	29514700	4841330	728
	29514600	4841520	615
	29514500	4841510	682
	29514600	4841420	699
	29514600	4841470	677
	29514600	4841470	634
	29514600	4841460	670
	29514600	4841410	665
	29514600	4841350	699
	29514700	4841390	753
	29514700	4841200	741
	29514900	4841220	771
	29514700	4841440	717
	29514600	4841580	679
	29514700	4841280	724
	29514500	4841450	635
	29514600	4841400	704
	29514500	4841630	716
	29514700	4841370	721
	29514600	4841630	654
	29514700	4841530	643
	29514600	4841570	765
	29514600	4841370	698
	29514500	4841530	656
	29514700	4841380	714
	29514500	4841430	609
	29515300	4841360	805
	29514800	4841360	801
	29514700	4841330	716
	29514600	4841420	695
	29514700	4841420	878
	29514700	4841440	691
	29514600	4841400	675
	29514600	4841500	720
	29514600	4841410	676
	29514600	4841370	612
	29514600	4841540	692
	29514700	4841440	716
	29514600	4841450	725
	29514600	4841300	712
	29514600	4841510	729
	29514700	4841450	703
	29514900	4841180	774
	29515000	4841270	765
	29514900	4841210	739
	29514800	4840910	764
	29515000	4841860	623
	29515100	4841140	962
	29514700	4841490	768
	29514700	4841360	739
	29514600	4841420	690
	29514600	4841520	648
	29514600	4841420	684
	29514700	4841300	762
	29514600	4841450	723
	29514600	4841430	708
	29514600	4841440	699
	29514700	4841370	721
	29514600	4841460	710
	29514500	4841500	734
	29514700	4841490	700
	29514600	4841420	705
	29514700	4841400	719
	29514800	4841430	707
	29514700	4841480	721
	29514500	4841580	644
	29514700	4841500	713
	29514600	4841440	689
	29514600	4841450	693
	29514500	4841310	771
	29514500	4841560	739
	29514700	4841370	702
	29514600	4841610	659
	29514700	4841400	704
	29514600	4841340	724
	29514600	4841490	698
	29514700	4841420	711
	29514800	4841280	728
	29514700	4841600	685
	29515400	4841460	760
	29514700	4841470	698
	29514700	4841390	715
	29514800	4841460	740
	29514700	4841600	710
	29514600	4841460	724
	29514700	4841240	744
	29514700	4841470	715
	29514700	4841470	710
	29514600	4841470	697
	29514600	4841530	684
	29514600	4841440	702
	29514700	4841510	696
	29514600	4841460	706
	29514700	4841370	740
	29514600	4841550	683
	29514600	4841540	686
	29514900	4841320	768
	29514600	4841440	719
	29514700	4841620	684
	29515200	4841120	777
	29515100	4841380	775
	29514700	4841390	734
	29514600	4841490	705
	29514600	4841500	685
	29514700	4841390	739
	29514600	4841510	671
	29514600	4841480	695
	29514600	4841550	675
	29514700	4841500	745
	29514600	4841460	724
	29514500	4841510	610
	29514700	4841440	758
	29514600	4841440	762
	29514700	4841340	713
	29514600	4841430	681
	29514700	4841510	861
	29514700	4841450	718
	29514600	4841480	745
	29514700	4841400	759
	29514700	4841380	768
	29514600	4841490	788
	29514700	4841360	767
	29514700	4841470	693
	29514600	4841510	700
	29514600	4841490	687
	29514600	4841450	728
	29514500	4841520	755
	29514600	4841450	685
	29514700	4841460	721
	29514600	4841560	688
	29514700	4841460	699
	29514700	4841490	766
	29514700	4841440	709
	29514700	4841510	697
	29514500	4841640	726
	29514600	4841470	756
	29514700	4841510	782
	29514700	4841480	690
	29514600	4841560	791
	29514700	4841420	744
	29514600	4841440	682
	29514700	4841490	702
	29514600	4841440	667
	29514700	4841440	772
	29514700	4841440	734
	29514600	4841260	767
	29514600	4841430	693
	29514700	4841450	744
	29514700	4841360	737
	29514700	4841340	748
	29514700	4841350	861
	29514700	4841600	716
	29514700	4841530	703
	29514600	4841530	738
	29514700	4841450	741
	29514700	4841490	706
	29514700	4841570	637
	29514600	4840970	765
	29514900	4841170	743
	29514800	4841210	735
	29514600	4841410	703
	29514700	4841430	721
	29514700	4841270	732
	29514600	4841520	712
	29514700	4841140	737
	29514700	4841380	712
	29515000	4841390	785
	29514400	4841300	668
	29514700	4841400	589
	29514800	4841390	732
	29514600	4841410	707
	29514700	4841480	741
	29514500	4841260	755
	29514600	4841430	750
	29514600	4841490	693
	29514700	4841410	717
	29514700	4841470	751
	29514600	4841400	744
	29514600	4841490	705
	29514700	4841570	577
	29514600	4841460	695
	29514600	4841510	699
	29514600	4841480	737
	29514700	4841440	865
	29514700	4841600	622
	29514600	4841500	721
	29514600	4841640	672
	29514600	4841480	699
	29514600	4841480	708
	29515100	4841500	730
	29514600	4841530	650
	29514600	4841470	700
	29514600	4841490	775
	29514600	4841490	688
	29514700	4841550	749
	29514800	4841400	777
	29514700	4841540	740
	29514700	4841380	767
	29514700	4841440	789
	29514500	4841590	794
	29514700	4841460	861
	29514700	4841470	709
	29514800	4841310	727
	29514700	4841500	713
	29514700	4841470	690
	29514700	4841440	704
	29514800	4841450	766
	29514600	4841570	686
	29515000	4841330	763
	29514200	4840920	735
	29514700	4841480	707
	29514700	4841430	758
	29514700	4841450	726
	29514700	4841400	693
	29514700	4841530	671
	29514700	4841450	701
	29514700	4841380	723
	29515000	4841240	777
	29514800	4841300	795
	29514600	4841620	620
	29514700	4841560	698
	29514700	4841430	738
	29514700	4841420	695
	29514600	4841530	703
	29514700	4841300	725
	29514800	4841410	773
	29514600	4841550	608
	29514700	4841510	700
	29514600	4841600	671
	29514600	4841690	613
	29514700	4841500	699
	29514600	4841590	687
	29514700	4841360	727
	29514700	4841340	719
	29514600	4841540	709
	29514200	4840850	743
	29514600	4841440	681
	29514600	4841860	610
	29514600	4841440	695
	29514700	4841410	714
	29514600	4841530	739
	29514600	4841590	606
	29514400	4841620	670
	29514700	4841500	790
	29514700	4841510	688
	29514600	4841620	664
	29514800	4841350	733
	29514600	4841690	701
	29514500	4841550	676
	29514700	4841150	745
	29514600	4841630	618
	29515000	4841640	701
	29514700	4841420	690
	29514600	4841620	738
	29514600	4841560	630
	29514600	4841550	669
	29514600	4841500	667
	29514600	4841410	739
	29514600	4841650	665
	29514700	4841560	710
	29514600	4841590	738
	29514600	4841600	680
	29514700	4841490	693
	29514600	4841560	710
	29514500	4841590	695
	29515100	4841470	796
	29514600	4841630	690
	29514700	4841460	756
	29514700	4841690	615
	29514800	4841500	710
	29514600	4841530	672
	29514600	4841100	760
	29514700	4841600	624
	29514700	4841480	756
	29514600	4841630	655
	29514600	4841600	613
	29514700	4841580	689
	29514600	4841620	705
	29514700	4841570	701
	29514600	4841570	593
	29514700	4841640	619
	29514800	4841460	767
	29514600	4841460	763
	29514600	4841580	677
	29514700	4841570	668
	29514200	4840830	733
	29514600	4841560	687
	29514600	4841540	708
	29514700	4841590	613
	29514700	4841630	699
	29514700	4841580	669
	29514600	4841590	670
	29514700	4841550	724
	29514700	4841220	725
	29514900	4841340	838
	29514700	4841550	696
	29514600	4841610	669
	29514600	4841540	692
	29514600	4841530	615
	29514700	4841580	713
	29514700	4841520	730
	29514700	4841580	688
	29514700	4841630	692
	29514800	4841520	739
	29514700	4841570	738
	29514700	4841370	747
	29514800	4841520	732
	29514600	4841520	699
	29514800	4841640	699
	29514800	4841460	722
	29514700	4841580	703
	29514700	4841500	703
	29514300	4840800	759
	29514900	4841070	928
	29514500	4841570	626
	29514700	4841560	714
	29514600	4841530	754
	29514800	4841470	709
	29514700	4841460	692
	29514700	4841590	690
	29514700	4841510	696
	29514700	4841590	775
	29514700	4841410	709
	29514700	4841510	693
	29514600	4841570	613
	29514700	4841570	694
	29514800	4841460	710
	29514700	4841480	714
	29514600	4841500	736
	29514700	4841480	689
	29514700	4841560	695
	29514700	4841540	681
	29514600	4841660	696
	29514700	4841440	761
	29514700	4841540	695
	29514600	4841570	662
	29514600	4841540	739
	29514700	4841550	733
	29514700	4841670	672
	29514700	4841550	700
	29514700	4841480	691
	29514600	4841500	718
	29514700	4841480	740
	29514800	4841610	691
	29514800	4841460	725
	29514300	4840810	762
	29514700	4841590	678
	29514700	4841560	753
	29514800	4841290	737
	29514700	4841550	721
	29514700	4841520	701
	29514700	4841610	695
	29514700	4841490	726
	29514700	4841590	605
	29514700	4841430	716
	29514700	4841570	686
	29514600	4841510	709
	29514700	4841580	697
	29514600	4841520	695
	29514100	4840810	742
	29514600	4841650	692
	29514600	4841560	674
	29514700	4841580	685
	29514700	4841610	675
	29514700	4841550	704
	29514600	4841560	746
	29514800	4841430	749
	29514700	4841370	723
	29514700	4841510	694
	29514700	4841510	705
	29514800	4841420	736
	29514700	4841550	681
	29514700	4841590	693
	29514700	4841550	696
	29514700	4841550	674
	29514800	4841540	690
	29515000	4841170	687
	29514800	4841460	710
	29514700	4841650	620
	29514800	4841470	716
	29514700	4841580	680
	29514700	4841540	610
	29514800	4841470	744
	29514700	4841500	690
	29514900	4841630	682
	29514800	4841490	703
	29514700	4841530	697
	29514700	4841580	716
	29514800	4841470	736
	29514600	4841580	708
	29514600	4841550	697
	29514700	4841570	703
	29514600	4841600	688
	29514700	4841520	700
	29514700	4841700	613
	29514700	4841510	768
	29514800	4841490	689
	29514900	4841320	720
	29514700	4841440	737
	29514700	4841550	690
	29514600	4841570	682
	29514600	4841570	681
	29514700	4841570	633
	29514600	4841630	686
	29514800	4841440	752
	29514600	4841080	759
	29514800	4841510	690
	29514700	4841210	730
	29514600	4841520	716
	29514700	4841550	714
	29514800	4841480	717
	29514800	4841590	704
	29514700	4841620	616
	29514600	4841450	699
	29514600	4841550	732
	29514600	4841530	705
	29514600	4841590	707
	29514600	4841600	697
	29514700	4841490	698
	29514700	4841620	689
	29514800	4841310	730
	29514700	4841610	709
	29514800	4841220	732
	29514800	4841600	686
	29514800	4841510	726
	29514800	4841430	727
	29514600	4841640	625
	29514800	4841620	617
	29514700	4841160	738
	29514700	4841550	627
	29514900	4841310	731
	29514700	4841570	735
	29514700	4841500	706
	29515000	4841450	734
	29514800	4841480	723
	29514500	4841720	659
	29514700	4841600	733
	29514700	4841560	674
	29514600	4841560	672
	29514700	4841600	738
	29514700	4841550	690
	29514600	4841620	685
	29514600	4841570	644
	29514800	4841550	730
	29514800	4841240	730
	29514800	4841490	724
	29514600	4841600	630
	29514700	4841590	620
	29514700	4841480	724
	29514700	4841620	687
	29514800	4841460	727
	29514800	4841630	670
	29514600	4841680	1055
	29515100	4841290	761
	29514600	4841670	616
	29514500	4841570	699
	29514700	4841540	692
	29514700	4841550	689
	29514800	4841530	689
	29514800	4841470	705
	29514700	4841680	618
	29514700	4841490	691
	29514700	4841570	640
	29514600	4841540	745
	29514800	4841530	742
	29514800	4841610	677
	29514800	4841610	612
	29514700	4841580	624
	29514800	4841570	689
	29514800	4841510	728
	29514600	4841660	613
	29514800	4841620	615
	29514900	4841570	700
	29514500	4841370	739
	29514700	4841570	705
	29514800	4841580	739
	29514800	4841550	691
	29514700	4841560	704
	29514800	4841250	734
	29514800	4841450	736
	29514600	4841530	728
	29514700	4841560	714
	29514700	4841540	635
	29514700	4841630	617
	29514900	4841680	603
	29514700	4841470	772
	29514700	4841630	616
	29515000	4841240	751
	29514700	4841590	666
	29514700	4841510	703
	29514800	4841620	768
	29514800	4841650	633
	29514700	4841630	627
	29514600	4841590	630
	29514200	4840830	750
	29514800	4841700	604
	29514800	4841680	619
	29514600	4841610	713
	29514700	4841550	693
	29514800	4841690	667
	29514700	4841570	628
	29514700	4841620	618
	29514600	4841620	630
	29514800	4841490	710
	29514800	4841640	704
	29514800	4841500	722
	29514700	4841320	759
	29514700	4841710	668
	29514800	4841480	708
	29514800	4841630	616
	29514700	4841590	739
	29514700	4841520	730
	29514900	4841650	725
	29514300	4840920	750
	29514800	4841660	616
	29514800	4841720	713
	29514800	4841570	691
	29514900	4841690	616
	29514700	4841580	703
	29514700	4841480	739
	29514700	4841510	734
	29514600	4841580	689
	29514800	4841630	615
	29514600	4841700	667
	29514600	4841520	742
	29514800	4841510	698
	29514800	4841580	621
	29514700	4841520	725
	29514700	4841710	669
	29514800	4841510	704
	29514600	4841470	745
	29514700	4841510	641
	29514600	4841610	621
	29514700	4841550	714
	29514900	4841480	710
	29514800	4841640	719
	29514700	4841530	767
	29514800	4841580	723
	29514800	4841670	700
	29514900	4841680	738
	29514700	4841600	624
	29514700	4841490	723
	29514900	4841700	741
	29514700	4841570	711
	29514800	4841420	724
	29514900	4841470	717
	29514800	4841630	717
	29514700	4841670	609
	29514800	4841680	613
	29514700	4841550	718
	29514800	4841520	748
	29514800	4841470	721
	29514700	4841600	701
	29514800	4841650	612
	29514700	4841540	689
	29514700	4841550	614
	29514800	4841500	697
	29514800	4841660	616
	29514700	4841490	713
	29514600	4841500	707
	29514700	4841260	747
	29515100	4841380	747
	29514800	4841620	700
	29514800	4841600	698
	29514700	4841630	635
	29514700	4841540	695
	29515000	4841670	784
	29514700	4841620	674
	29514800	4841560	683
	29514700	4841630	647
	29514800	4841600	706
	29514700	4841670	611
	29514800	4841680	675
	29514800	4841600	678
	29514800	4841520	731
	29514700	4841640	694
	29514900	4841340	725
	29514800	4841410	758
	29514700	4841690	670
	29514800	4841620	705
	29514700	4841640	613
	29514800	4841520	754
	29514600	4841040	757
	29514900	4841570	689
	29514300	4840800	753
	29514800	4841690	616
	29514800	4841630	688
	29514800	4841510	692
	29514700	4841620	697
	29514700	4841630	608
	29514800	4841610	688
	29514900	4841630	746
	29514800	4841590	686
	29514800	4841680	603
	29514700	4841560	733
	29514900	4841720	615
	29514800	4841580	701
	29514700	4841650	679
	29514800	4841610	691
	29514700	4841220	731
	29514700	4841750	652
	29514700	4841640	689
	29514800	4841630	634
	29514700	4841630	666
	29514800	4841590	726
	29514700	4841530	691
	29514700	4841510	693
	29514800	4841640	735
	29514700	4841570	621
	29514700	4841540	702
	29514800	4841580	687
	29514700	4841640	634
	29514900	4841700	648
	29514900	4841650	622
	29514800	4841710	616
	29514800	4841630	682
	29514900	4841650	635
	29514700	4841690	657
	29514800	4841420	758
	29514800	4841720	619
	29514800	4841700	644
	29514800	4841680	620
	29514800	4841630	663
	29514700	4841660	617
	29514700	4841590	692
	29514500	4840990	753
	29514800	4841630	720
	29514700	4841630	686
	29514800	4841590	702
	29514800	4841700	619
	29514800	4841600	690
	29514800	4841570	683
	29514700	4841610	641
	29514700	4841660	680
	29514700	4841610	667
	29514800	4841710	609
	29514700	4841670	700
	29514600	4841680	713
	29514700	4841710	630
	29514200	4840790	740
	29514000	4840880	746
	29514800	4841630	701
	29514700	4841730	617
	29514700	4841620	727
	29514700	4841660	623
	29514100	4840770	763
	29514200	4840840	723
	29514100	4840840	852
	29514100	4840790	757
	29514100	4840930	798
	29514800	4841580	693
	29514200	4840770	730
	29514700	4841680	697
	29514500	4840960	751
	29514900	4841720	636
	29514800	4841450	723
	29514200	4840740	767
	29514200	4840770	755
	29514200	4840780	750
	29514700	4841660	624
	29514800	4841620	738
	29515000	4841620	644
	29514800	4841650	714
	29514700	4841660	614
	29514800	4841640	682
	29514100	4840940	740
	29514800	4841680	643
	29515000	4841510	732
	29514700	4841640	696
	29514900	4841710	697
	29514800	4841680	655
	29514100	4840770	748
	29514100	4840830	741
	29514900	4841710	634
	29514800	4841630	617
	29514700	4841540	689
	29514800	4841720	608
	29514800	4841690	617
	29514800	4841660	685
	29514700	4841620	686
	29515100	4841680	730
	29514100	4840770	744
	29514800	4841640	700
	29514800	4841560	702
	29514800	4841600	699
	29514800	4841710	612
	29514800	4841700	688
	29514500	4841090	750
	29515000	4841740	700
	29514800	4841580	690
	29514200	4840790	754
	29514200	4840790	749
	29514200	4840820	755
	29514800	4841670	619
	29514100	4840840	743
	29514800	4841670	621
	29514100	4840780	748
	29515200	4841470	765
	29514800	4841650	687
	29514200	4840880	746
	29514100	4840800	740
	29514100	4840790	752
	29514100	4840770	768
	29514900	4841650	665
	29514100	4840790	734
	29514100	4841000	779
	29514300	4840870	750
	29514100	4840810	738
	29514400	4841010	759
	29514900	4841350	742
	29514800	4841660	623
	29514800	4841680	613
	29514800	4841670	604
	29514200	4840780	752
	29514800	4841540	720
	29514800	4841650	617
	29514800	4841580	703
	29514900	4841630	668
	29514900	4841730	609
	29514900	4841770	699
	29514800	4841650	612
	29514800	4841600	678
	29514700	4841640	700
	29514900	4841740	614
	29514700	4841650	609
	29514800	4841600	715
	29514900	4841790	602
	29515000	4841690	706
	29514500	4841090	737
	29514800	4841520	703
	29514800	4841730	682
	29515300	4841400	753
	29514900	4841580	694
	29514900	4841740	616
	29514300	4841200	723
	29514800	4841620	715
	29514700	4841600	621
	29514800	4841570	756
	29514800	4841620	749
	29514800	4841840	611
	29514700	4841710	605
	29514800	4841700	613
	29514900	4841780	615
	29514800	4841790	703
	29514800	4841620	719
	29514600	4841080	725
	29514800	4841530	768
	29514600	4841770	606
	29514700	4841600	693
	29514800	4841600	764
	29514800	4841650	684
	29514800	4841700	613
	29514800	4841700	609
	29514500	4841200	715
	29514800	4841670	677
	29514800	4841640	632
	29514800	4841760	652
	29515000	4841650	693
	29514200	4840780	743
	29515000	4841760	718
	29514800	4841530	702
	29514900	4841620	696
	29515000	4841650	730
	29514900	4841750	624
	29514700	4841660	622
	29514700	4841380	722
	29514700	4841610	691
	29514300	4840920	759
	29515100	4841890	612
	29514900	4841590	736
	29514800	4841710	616
	29514200	4840810	762
	29514200	4840790	754
	29514200	4840740	747
	29514900	4841660	613
	29514800	4841650	620
	29514800	4841700	630
	29514800	4841710	617
	29514300	4840950	725
	29514900	4841700	624
	29514800	4841630	610
	29514900	4841720	613
	29515000	4841770	617
	29514900	4841770	615
	29514800	4841660	613
	29514300	4840800	758
	29514900	4841770	611
	29514200	4840710	763
	29514900	4841790	617
	29514900	4841800	603
	29514900	4841730	620
	29514800	4841700	620
	29514800	4841620	694
	29514300	4840880	723
	29514600	4841110	712
	29514800	4841720	612
	29514500	4841040	732
	29515100	4841430	735
	29514900	4841750	665
	29514900	4841700	617
	29514400	4840900	850
	29514500	4841260	712
	29514900	4841500	735
	29514800	4841690	634
	29514500	4841060	728
	29514900	4841560	710
	29514900	4841710	747
	29515000	4841670	713
	29515000	4841640	721
	29514800	4841740	622
	29514800	4841680	702
	29515000	4841650	690
	29515000	4841520	726
	29514800	4841700	693
	29514800	4841620	692
	29514800	4841710	692
	29514700	4841610	653
	29515000	4841700	691
	29515000	4841680	699
	29514200	4840740	756
	29514800	4841710	623
	29514900	4841670	628
	29514800	4841640	730
	29514900	4841590	711
	29515000	4841690	703
	29514900	4841640	706
	29514900	4841710	672
	29514800	4841680	686
	29514900	4841690	698
	29514200	4840730	768
	29514900	4841680	685
	29514800	4841690	626
	29515000	4841600	707
	29514900	4841670	671
	29514900	4841710	687
	29514800	4841680	624
	29514900	4841720	614
	29514800	4841660	613
	29514500	4841440	648
	29514800	4841660	637
	29514900	4841730	694
	29514900	4841660	710
	29515300	4841530	747
	29514800	4841750	614
	29514900	4841770	616
	29514900	4841630	698
	29515100	4841260	754
	29514800	4841680	631
	29514300	4840870	744
	29514900	4841650	691
	29514300	4840740	778
	29514300	4840740	773
	29514700	4841390	764
	29514200	4840820	773
	29514900	4841720	620
	29514900	4841660	713
	29514900	4841750	756
	29514900	4841710	695
	29515000	4841670	698
	29514900	4841640	698
	29514900	4841610	701
	29514800	4841660	678
	29514900	4841710	691
	29514900	4841710	711
	29514200	4840760	742
	29514900	4841720	704
	29514400	4840820	779
	29514800	4841680	712
	29514800	4841700	689
	29514200	4840740	758
	29514900	4841690	692
	29514900	4841590	727
	29514900	4841720	620
	29514800	4841680	698
	29514900	4841730	620
	29514200	4840750	749
	29514200	4840870	767
	29514300	4840740	774
	29514900	4841710	713
	29514900	4841720	657
	29514800	4841650	698
	29514400	4841350	717
	29514800	4841710	615
	29514300	4840910	744
	29515000	4841760	625
	29514800	4841660	671
	29514800	4841610	695
	29514900	4841690	694
	29514900	4841740	680
	29514900	4841570	695
	29514300	4840950	733
	29514900	4841670	701
	29514900	4841730	633
	29514900	4841740	678
	29515200	4841750	701
	29514900	4841700	623
	29514900	4841620	709
	29514300	4840790	757
	29514200	4840750	762
	29515000	4841810	620
	29514300	4840790	758
	29514900	4841680	699
	29514900	4841720	617
	29514300	4840870	755
	29514600	4841020	750
	29515000	4841680	685
	29514900	4841730	703
	29514900	4841570	705
	29515000	4841820	615
	29514200	4840870	780
	29514900	4841700	716
	29515000	4841700	690
	29514900	4841690	622
	29515000	4841670	700
	29515000	4841740	615
	29514900	4841750	620
	29515000	4841660	711
	29514900	4841700	620
	29515000	4841690	704
	29514800	4841620	692
	29514900	4841660	694
	29514800	4841650	612
	29514900	4841610	697
	29514900	4841740	621
	29514300	4840790	755
	29514900	4841750	639
	29514800	4841650	709
	29515000	4841660	698
	29514900	4841600	695
	29514900	4841700	715
	29514900	4841770	627
	29514800	4841720	681
	29514900	4841700	705
	29515000	4841680	703
	29514900	4841680	695
	29514900	4841780	626
	29514900	4841740	619
	29514900	4841670	703
	29514900	4841740	610
	29514900	4841670	675
	29514800	4841730	629
	29514900	4841750	622
	29515000	4841680	694
	29514700	4841640	681
	29514800	4841630	695
	29514900	4841750	615
	29514800	4841710	623
	29515000	4841700	694
	29514900	4841780	617
	29515000	4841680	698
	29514900	4841710	713
	29514900	4841590	693
	29514800	4841710	621
	29514900	4841660	706
	29515000	4841660	703
	29515000	4841700	692
	29515000	4841670	695
	29514900	4841680	697
	29514800	4841720	624
	29514800	4841730	642
	29514800	4841610	703
	29514900	4841730	698
	29515000	4841670	699
	29514900	4841700	702
	29514900	4841630	700
	29514900	4841650	718
	29515000	4841640	703
	29514900	4841770	609
	29515000	4841670	703
	29514600	4841290	721
	29515000	4841670	693
	29515000	4841750	619
	29514900	4841640	662
	29514900	4841780	618
	29514900	4841800	625
	29514900	4841800	615
	29515000	4841810	667
	29515000	4841760	614
	29514900	4841620	707
	29514900	4841810	623
	29515100	4841670	733
	29515200	4841620	734
	29514400	4841030	752
	29514900	4841540	711
	29514800	4841730	620
	29514900	4841800	626
	29515000	4841670	692
	29515000	4841750	617
	29514900	4841800	646
	29514900	4841740	692
	29515000	4841710	699
	29514900	4841820	610
	29514900	4841720	692
	29514900	4841770	611
	29515000	4841820	662
	29515000	4841690	697
	29514900	4841770	612
	29514900	4841820	612
	29515000	4841680	689
	29514900	4841790	621
	29515100	4841480	745
	29514800	4841620	699
	29514900	4841800	612
	29515000	4841840	611
	29515000	4841660	699
	29515000	4841650	696
	29515000	4841800	605
	29515000	4841830	622
	29515000	4841740	693
	29515100	4841640	702
	29515000	4841780	616
	29514900	4841810	615
	29515000	4841760	609
	29515000	4841560	714
	29514800	4841750	612
	29515000	4841650	696
	29515000	4841660	698
	29515000	4841720	699
	29515000	4841660	694
	29515000	4841690	695
	29515000	4841790	620
	29514900	4841760	613
	29515000	4841640	691
	29515000	4841760	616
	29514900	4841770	611
	29514900	4841740	708
	29515000	4841700	697
	29514900	4841770	611
	29515000	4841640	685
	29515000	4841700	696
	29514800	4841740	611
	29515000	4841720	687
	29515000	4841690	692
	29515000	4841720	620
	29515000	4841680	694
	29515000	4841680	699
	29514900	4841800	614
	29514900	4841790	582
	29515000	4841650	693
	29514900	4841750	619
	29514800	4841680	680
	29514600	4841120	730
	29514900	4841800	680
	29514800	4841730	616
	29515000	4841690	704
	29514900	4841790	631
	29514900	4841760	621
	29514900	4841710	701
	29514900	4841740	664
	29515000	4841670	708
	29515000	4841710	703
	29514900	4841580	702
	29514900	4841610	709
	29514900	4841710	614
	29514900	4841760	622
	29515000	4841660	707
	29515000	4841670	699
	29515000	4841660	697
	29515000	4841690	688
	29514900	4841620	706
	29514800	4841640	711
	29514900	4841710	707
	29515000	4841730	677
	29515000	4841730	699
	29515000	4841720	691
	29515000	4841720	695
	29515000	4841720	692
	29514900	4841790	616
	29515000	4841720	697
	29515000	4841710	699
	29514900	4841730	706
	29515100	4841680	707
	29514900	4841720	702
	29515000	4841650	713
	29514900	4841790	627
	29514900	4841740	624
	29515000	4841790	617
	29514900	4841630	689
	29515000	4841760	705
	29515000	4841670	708
	29515000	4841700	701
	29514900	4841710	701
	29514900	4841510	733
	29514900	4841650	712
	29514400	4841270	717
	29515000	4841640	710
	29514900	4841710	623
	29514900	4841730	620
	29515000	4841780	613
	29515000	4841720	700
	29515000	4841670	704
	29515200	4841620	734
	29515000	4841750	626
	29515000	4841670	694
	29515000	4841700	699
	29515000	4841760	624
	29514800	4841690	700
	29515000	4841620	696
	29514900	4841770	634
	29515000	4841650	699
	29515000	4841730	698
	29515000	4841740	637
	29514900	4841760	619
	29514900	4841700	699
	29515000	4841670	703
	29514900	4841720	708
	29514900	4841770	631
	29515000	4841800	613
	29515000	4841700	697
	29515000	4841780	619
	29515000	4841660	705
	29515000	4841790	617
	29515000	4841750	701
	29515000	4841620	704
	29514900	4841800	608
	29515100	4841690	725
	29514900	4841690	707
	29515000	4841610	708
	29514900	4841720	706
	29515000	4841720	702
	29515000	4841670	699
	29515000	4841660	690
	29515000	4841750	699
	29514900	4841790	615
	29514800	4841820	609
	29515000	4841770	624
	29515000	4841750	701
	29515000	4841730	694
	29515000	4841740	701
	29514900	4841690	715
	29514900	4841770	614
	29515100	4841760	707
	29515000	4841740	708
	29515000	4841640	691
	29515000	4841730	686
	29515000	4841650	702
	29515000	4841810	611
	29515000	4841630	698
	29514900	4841630	701
	29515000	4841780	619
	29515000	4841730	690
	29514900	4841820	609
	29515000	4841760	694
	29515000	4841710	703
	29514800	4841620	702
	29515200	4841790	697
	29515000	4841630	706
	29515000	4841600	711
	29515000	4841710	690
	29515100	4841770	694
	29515000	4841640	707
	29515000	4841700	696
	29514900	4841820	620
	29515100	4841770	621
	29515100	4841700	699
	29515000	4841720	692
	29515100	4841660	710
	29515100	4841550	728
	29515100	4841720	697
	29515200	4841800	695
	29515000	4841690	693
	29515000	4841690	688
	29515000	4841650	703
	29514300	4841340	715
	29515100	4841700	698
	29515000	4841640	708
	29515000	4841720	689
	29515000	4841690	703
	29515000	4841780	608
	29515100	4841650	700
	29515000	4841730	715
	29515000	4841620	694
	29514300	4840720	755
	29515000	4841770	719
	29515000	4841740	697
	29514200	4840900	732
	29515000	4841600	704
	29514900	4841770	620
	29515000	4841820	622
	29515000	4841790	622
	29515000	4841710	697
	29515000	4841700	693
	29515000	4841810	748
	29514200	4840760	763
	29515000	4841740	615
	29515000	4841800	621
	29515000	4841690	698
	29515100	4841750	694
	29515100	4841740	698
	29515000	4841680	704
	29514900	4841790	622
	29514900	4841770	619
	29515000	4841820	617
	29515000	4841730	698
	29515100	4841830	618
	29515200	4841520	742
	29514900	4841260	732
	29515000	4841800	616
	29515000	4841830	609
	29515000	4841670	697
	29515000	4841700	693
	29515000	4841650	704
	29515000	4841770	695
	29515000	4841750	702
	29515000	4841690	697
	29515000	4841830	620
	29515000	4841700	699
	29515100	4841740	689
	29515000	4841700	694
	29514700	4841720	601
	29515000	4841810	609
	29515100	4841760	687
	29515200	4841710	705
	29515000	4841680	696
	29515100	4841780	698
	29515000	4841650	694
	29515100	4841730	697
	29515000	4841600	713
	29515200	4841770	698
	29515000	4841670	729
	29515100	4841720	697
	29515000	4841790	616
	29515000	4841820	625
	29514800	4841630	682
	29515000	4841750	621
	29515000	4841610	698
	29515100	4841650	710
	29515000	4841710	695
	29515100	4841720	705
	29515000	4841760	697
	29515000	4841830	620
	29515000	4841780	612
	29514800	4841800	631
	29515000	4841810	617
	29515000	4841740	698
	29514900	4841720	690
	29515000	4841830	613
	29515100	4841830	615
	29515000	4841770	697
	29515000	4841650	703
	29515000	4841800	617
	29515200	4841560	731
	29515000	4841750	704
	29515000	4841660	703
	29515000	4841710	703
	29515000	4841790	621
	29515000	4841670	702
	29514900	4841710	634
	29514900	4841650	707
	29515000	4841610	694
	29515100	4841760	696
	29515000	4841800	611
	29514900	4841610	714
	29515100	4841700	701
	29515100	4841730	702
	29515000	4841820	623
	29515000	4841710	692
	29515000	4841780	704
	29515000	4841780	615
	29515000	4841820	616
	29515000	4841850	614
	29515000	4841690	693
	29515000	4841690	707
	29515000	4841570	715
	29515000	4841620	708
	29515000	4841660	704
	29515000	4841680	695
	29515000	4841510	732
	29515000	4841800	617
	29515100	4841810	697
	29514200	4840710	770
	29515100	4841760	704
	29515100	4841670	703
	29515000	4841700	717
	29515000	4841840	617
	29515000	4841760	696
	29515000	4841710	706
	29515000	4841660	695
	29515100	4841780	706
	29514900	4841890	607
	29514900	4841700	679
	29514400	4840770	757
	29515000	4841900	609
	29515000	4841730	614
	29514900	4841620	704
	29515000	4841760	610
	29515000	4841660	699
	29514400	4840730	761
	29515000	4841670	704
	29515000	4841640	708
	29514900	4841640	704
	29515000	4841660	704
	29514900	4841750	699
	29515000	4841760	702
	29515000	4841800	657
	29514300	4840860	719
	29514900	4841650	695
	29515000	4841640	691
	29515100	4841880	616
	29515200	4841570	739
	29515000	4841800	611
	29515000	4841820	615
	29514300	4840900	737
	29514300	4840860	758
	29514300	4840860	743
	29515000	4841590	707
	29515000	4841650	709
[truncated: 522 more rows]
